# Supplementary material for: Breastfeeding rates are high in a prenatal community support program targeting vulnerable women and offering enhanced postnatal lactation support: a prospective cohort study
Source: PubMed Central journal article supplement (PMC7931510; doi:10.1186/s12939-021-01386-6), 2021-03-03
Supplement: 12939_2021_1386_MOESM2_ESM.pdf [file 12939_2021_1386_MOESM2_ESM.pdf]

**Supplementary Table 2.** Univariate analysis results: Relationship between maternal sociodemographic characteristics and exclusive breastfeeding at 6 months

| Maternal Characteristics    | Exclusive Breastfeeding at 6 months |                      |         |
|-----------------------------|-------------------------------------|----------------------|---------|
|                             | No<br>No./Total (%)                 | Yes<br>No./Total (%) | p-value |
| Education                   |                                     |                      |         |
| ≤ High school               | 58/140 (41)                         | 10/50 (20)           | 0.0067* |
| Post-secondary              | 82/140 (59)                         | 40/50 (80)           |         |
| Food insecurity             |                                     |                      |         |
| Yes                         | 80/142 (56)                         | 25/50 (50)           | 0.4388  |
| No                          | 62/142 (44)                         | 25/50 (50)           |         |
| Number of children          |                                     |                      |         |
| First-time mother           | 70/139 (50)                         | 23/50 (46)           | 0.5969  |
| ≥ 1 child                   | 69/139 (50)                         | 27/50 (54)           |         |
| Years in Canada             |                                     |                      |         |
| <3 years                    | 45/140 (32)                         | 15/50 (30)           | 0.3452  |
| ≥3 years                    | 85/140 (61)                         | 28/50 (56)           |         |
| Born in Canada              | 10/140 (7)                          | 7/50 (14)            |         |
| Single parent               |                                     |                      |         |
| Yes                         | 40/139 (29)                         | 17/50 (34)           | 0.4901  |
| No                          | 99/139 (71)                         | 33/50 (66)           |         |
| Household income            |                                     |                      |         |
| Below Low-Income Cut-Off    | 78/129 (61)                         | 27/44 (61)           | 0.9161  |
| Above Low-Income Cut-Off    | 51/129 (40)                         | 17/44 (39)           |         |
| Age (mean, SD) <sup>a</sup> | 32.6 (5.41)                         | 31.6 (4.93)          | 0.2416  |

Data analyzed using Chi-square tests for categorical variables and T-tests for continuous variables.

Participants with missing exclusive breastfeeding at 6 months data were excluded from these analyses (n=7). The total number may vary between cells depending on missing sociodemographic data. \*p<0.05

<sup>a</sup>Missing age data for three participants.
