# Supplementary material for: Breastfeeding rates are high in a prenatal community support program targeting vulnerable women and offering enhanced postnatal lactation support: a prospective cohort study
Source: Springer Nature journal article supplement (doi:10.1186/s12939-021-01386-6), 2021-03-03
Supplement: MOESM1 [file 18925698]

**Supplementary Table 1.** Data collection timeline

| <b>Study Instrument</b>                               | <b>Postnatal Data Collection</b> |          |          |          |
|-------------------------------------------------------|----------------------------------|----------|----------|----------|
|                                                       | 2 weeks                          | 2 months | 4 months | 6 months |
| Maternal Sociodemographics Questionnaire <sup>a</sup> | X                                |          |          |          |
| Infant Feeding Questionnaire                          | X                                | X        | X        | X        |
| Food Security Questionnaire <sup>b</sup>              |                                  |          |          | X        |

<sup>a</sup>Maternal sociodemographics include age, length of time in Canada, education, single parent status, number of children, ethnicity and household income

<sup>b</sup>The 18-item Canadian Community Health Survey Household Food Security Survey Module was used to measure household food insecurity
